# Supplementary material for: Promoting electrocatalytic water oxidation via crafting Co–O–W bridge bonds on an amorphous core/shell NiCo-ZIF@POM catalyst
Source: Royal Society of Chemistry journal article supplement (doi:10.1039/d4qi01319k), 2024-01-01
Supplement: d4qi01319k1.pdf [file d4qi01319k1.pdf]

## Supporting information

### **Promoting Electrocatalytic Water Oxidation via crafting Co-O-W bridge bonds on Amorphous core/shell NiCo- ZIF@POM catalyst**

Tianhao Yu,<sup>1</sup> Peng Gao,<sup>1</sup> Hong Du<sup>1,2</sup> \* (✉), Ling Dong<sup>1</sup> \*(✉)

1 College of Chemistry and Chemical Engineering, Xinjiang Normal University,  
Urumqi, 830054, China

2 Xinjiang Key Laboratory of Energy Storage and Photoelectrocatalytic Materials,  
Urumqi, 830054, China

\*Corresponding Author:

175790509@ qq.com (Prof. Hong Du)

1057618470@ qq.com (Prof. Ling Dong)

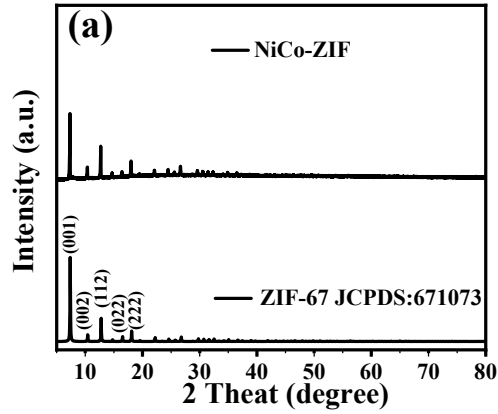

**Fig. S1** (a) XRD pattern of catalyst NiCo-ZIF and simulate ZIF-67.

**Fig. S2** N<sub>2</sub> sorption isotherms of (a) NiCo-ZIF and (b) NiCo-ZIF@POM (1:3).

**Fig. S3.** (a) N 1s, (b) Ni 2p of NiCo-ZIF@POM (1:3).

**Table S1** Catalyst based ZIF-67, reaction condition, and OER performances.

| Catalysts                                  | Electrolyte | Substrate | $\eta_{10}$ (mV) | Ref. |
|--------------------------------------------|-------------|-----------|------------------|------|
| F-N/FeCoNC900                              | 1.0 M KOH   | GC        | 273              | 1    |
| BSCF/ZIF(67)-650                           | 1.0 M KOH   | CP        | 285              | 2    |
| Co-Zn-CNTs-20                              | 1.0 M KOH   | GC        | 308              | 3    |
| Co <sub>3</sub> O <sub>4</sub> @CoP/NS-RGO | 1.0 M KOH   | GC        | 288              | 4    |
| NiFeCo-LDH/CF                              | 1.0 M KOH   | CF        | 249              | 5    |
| CoOOH@Co-FeOOH DSAs                        | 1.0 M KOH   | NF        | 224              | 6    |
| FeeCoS <sub>2</sub> /CNT CPs               | 1.0 M KOH   | CP        | 293              | 7    |
| CoMoOS                                     | 1.0 M KOH   | GC        | 281              | 8    |

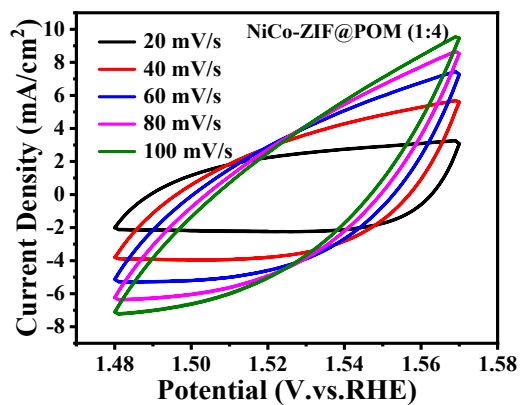

|                         |           |    |     |    |
|-------------------------|-----------|----|-----|----|
| IrOx@Ni/Co-ZIF-67       | 1.0 M KOH | GC | 251 | 9  |
| NiMoO <sub>4</sub> -ZIF | 1.0 M KOH | CC | 235 | 10 |

**Fig. S4** (a) LSV (b) Tafel slopes (c) EIS and (d) ECSA of NiCo-ZIF@POM (1:1), NiCo-ZIF@POM (1:2), NiCo-ZIF@POM (1:3), and NiCo-ZIF@POM (1:4).

**Fig. S5** (a)-(e) are ECSA of NiCo-ZIF, NiCo-ZIF@POM (1:1), NiCo-ZIF@POM (1:2), NiCo-ZIF@POM (1:3), and NiCo-ZIF@POM (1:4).  
(e)

**Fig. S6** (a) XRD, (b) XPS, and (c) TEM of NiCo-ZIF@POM (1:3) before and after the OER measurement.

**Fig. S7** (a) The geometric configuration of NiCo-ZIF; (b) The mechanism cycle diagram of OER on NiCo-ZIF in the alkaline media.

## References

1. X. He, L. Chang, H. Wu, G. Liu, Y. Zhang and A. Zhou, Design of ZIF-67-derived Fe, N and F co-doped porous carbon material and evaluation of its ORR and OER performance, *J. Alloys Compd.* 2023, **967**, 171709-171720.
2. H. Gao, F. Han, S. Yi, L. Chen and D. Chen, OER catalyst fabricated with ZIF-67 derived carbon and selectively exsolvated perovskite oxide, *J. Alloys Compd.* 2023, **963**, 170908-170938.
3. J. Wang, S. Chaemchuen, C. Chen, P. M. Heynderickx, S. Roy and F. Verpoort, N-functionalized hierarchical carbon composite derived from ZIF-67 and carbon foam for efficient overall water splitting, *J. Ind. Eng. Chem.* 2022, **105**, 222-230.
4. B. Liu, S. Xue, S. Tan, D. Zhang, Z. Deng, H. Pan, W. Tu, R. Zhang, H. Zhang and Y. Wang, Hollow-Co<sub>3</sub>O<sub>4</sub>@CoP/NS-RGO Heterojunction Structure Derived from ZIF-67 Promotes Hydrogen Evolution Reaction and Oxygen Evolution Reaction Bifunctional Catalysis, *Energy Fuels* 2022, **36**, 4532-4540.
5. Y. Lin, H. Wang, C. K. Peng, L. Bu, C. L. Chiang, K. Tian, Y. Zhao, J. Zhao, Y. G. Lin, J. M. Lee and L. Gao, Co-Induced Electronic Optimization of Hierarchical NiFe LDH for Oxygen Evolution, *Small.* 2020, **16**, 2002426-2002435.
6. E. Hu, Y. Yao, Y. Cui, Z. Wang and G. Qian, Designed construction of hierarchical CoOOH@Co-FeOOH double-shelled arrays as superior water oxidation electrocatalyst, *J. Solid State Chem.* 2021, **294**, 121867-121875.
7. W. Li, X. Feng, X. Zeng, C. Gong, X. Chen, D. Li, Y. Zeng, X. Wang, X. Pan, Z. Shi and L. Zhao, ZIF-8@ZIF-67 derived Fe-CoS<sub>2</sub>/CNT carbon polyhedron for enhanced electrocatalytic oxygen evolution reaction, *Int. J. Hydrogen Energy.* 2024, **51**, 20-29.

8. H. Xu, H. Shang, C. Wang, L. Jin, C. Chen, C. Wang and Y. Du, Three-dimensional open CoMoO<sub>x</sub>/CoMoS<sub>x</sub>/CoS<sub>x</sub> nanobox electrocatalysts for efficient oxygen evolution reaction, *Appl. Catal., B*. 2020, **265**, 118605-118614.
9. S. Perumal, T. Lim, S. Seenivasan and J. Seo, Electrocatalytic oxygen evolution reaction at IrO<sub>x</sub> supported by Ni/Co-ZIF-67: Controlled ratio of metallic Ir and Ir<sup>3+</sup> states, *Appl. Surf. Sci.* 2022, **604**, 154553-154561.
10. M. Song, X. Lu, M. Du, Z. Chen, C. Zhu, H. Xu, W. Cheng, W. Zhuang, Z. Li and L. Tian, Electronic and architecture engineering of hammer-shaped Ir–NiMoO<sub>4</sub>-ZIF for effective oxygen evolution, *CrystEngComm*. 2022, **24**, 5995-6000.
